# Supplementary material
Source: PubMed Central journal article supplement (PMC2995278)

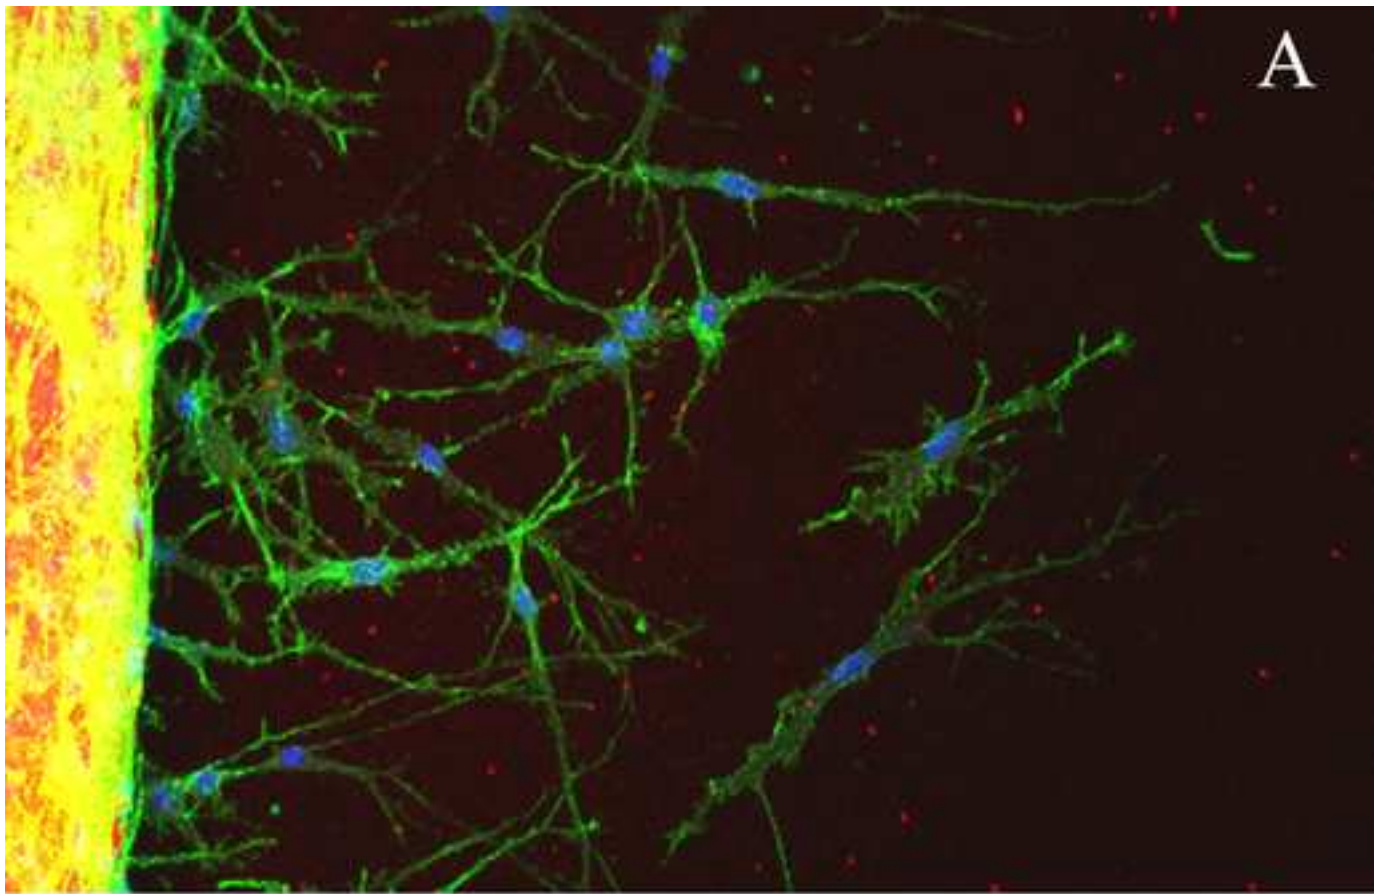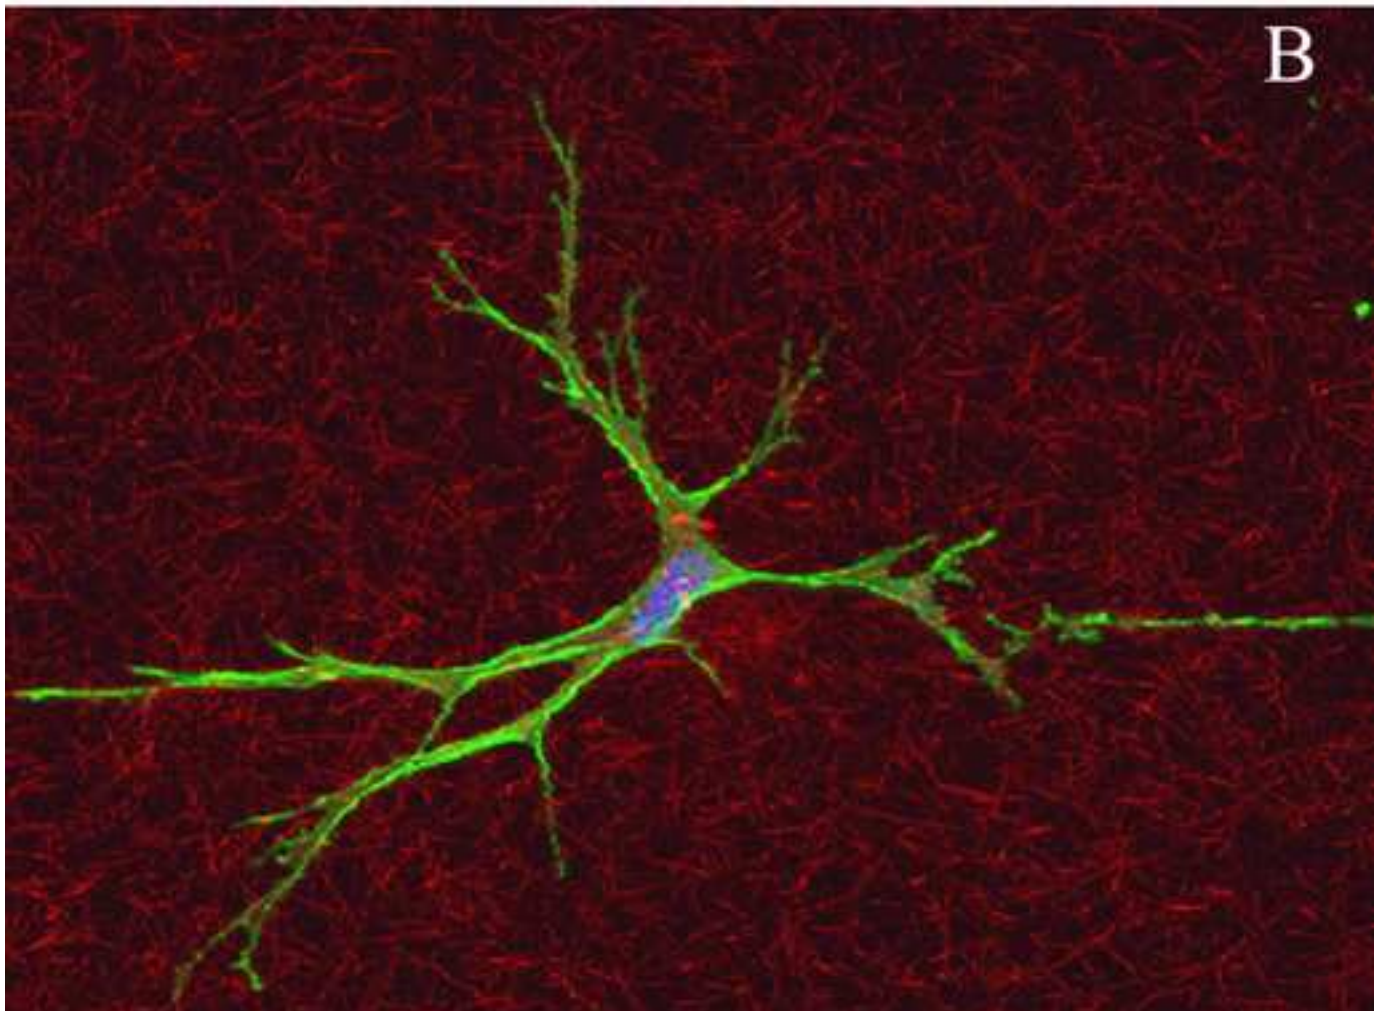

Supplement: NIHMS246622-supplement-supplement_1.pdf [file NIHMS246622-supplement-supplement_1.pdf]
